# Supplementary material
Source: PubMed Central journal article supplement (PMC3911312)
Supplement: JCM.02763-13_zjm999093151so1.pdf [file JCM.02763-13_zjm999093151so1.pdf]

1 **Supplementary Text:**

2 A number of the singletons also appear to be rather closely related to isolates in other STs  
3 within this collection based on the cladogram in Fig. 1 including ST<sup>T</sup>-T517 (n=1), 99.8%  
4 identical (SLV differing by four nt in *salA*) to ST<sup>T</sup>-T525 (n=2); ST<sup>T</sup>-T505 (n=1), 99.9%  
5 identical (DLV differing by one nt in *ace* and one nt in *salA*) to ST<sup>T</sup>-T509; ST<sup>T</sup>-T514  
6 (n=1), 99.9% identical (SLV differing by a 6 nt deletion in *lsa*) to ST<sup>T</sup>-144 (n=1); ST<sup>T</sup>-  
7 T507 (n=1), 99.7% identical (SLV differing by 8 nt in *salA*) to ST<sup>T</sup>-107 (n=2); ST<sup>T</sup>-T504  
8 (n=1), 99.7% identical (SLV differing by 6 nt in *salA*) to ST<sup>T</sup>-T506 (n=1); and ST<sup>T</sup>-T512  
9 (n=1), 99.9% identical (SLV differing by one nt in *lsa*) to ST<sup>T</sup>-20 (n=4).

10

11

12 **Supplementary Figures:**

13 Fig. S1a:

14

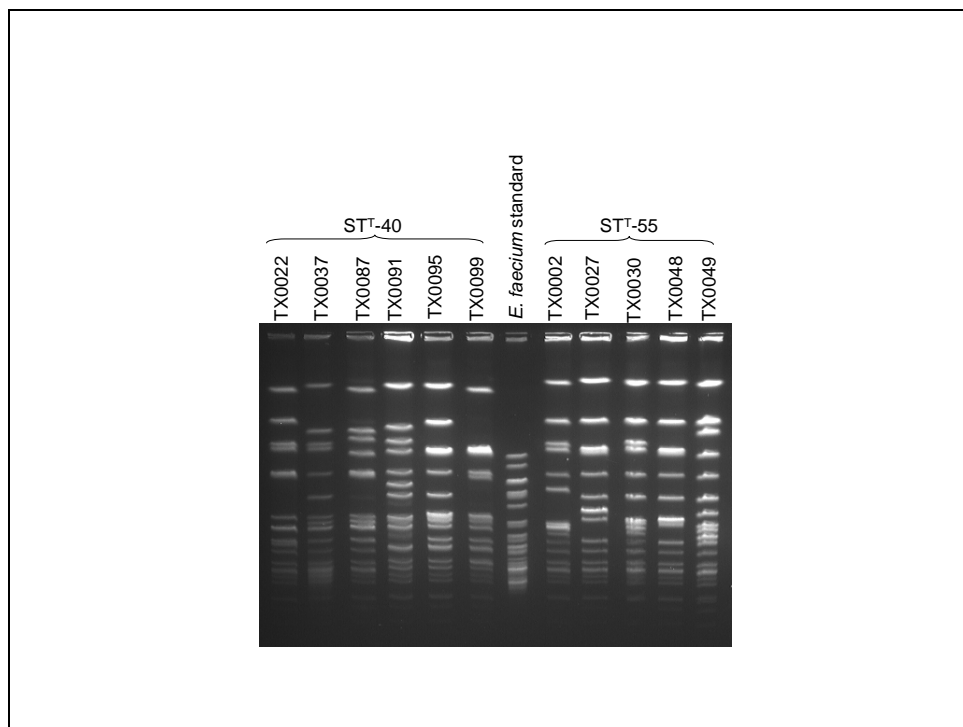

15  
16

17 Fig. S1b:

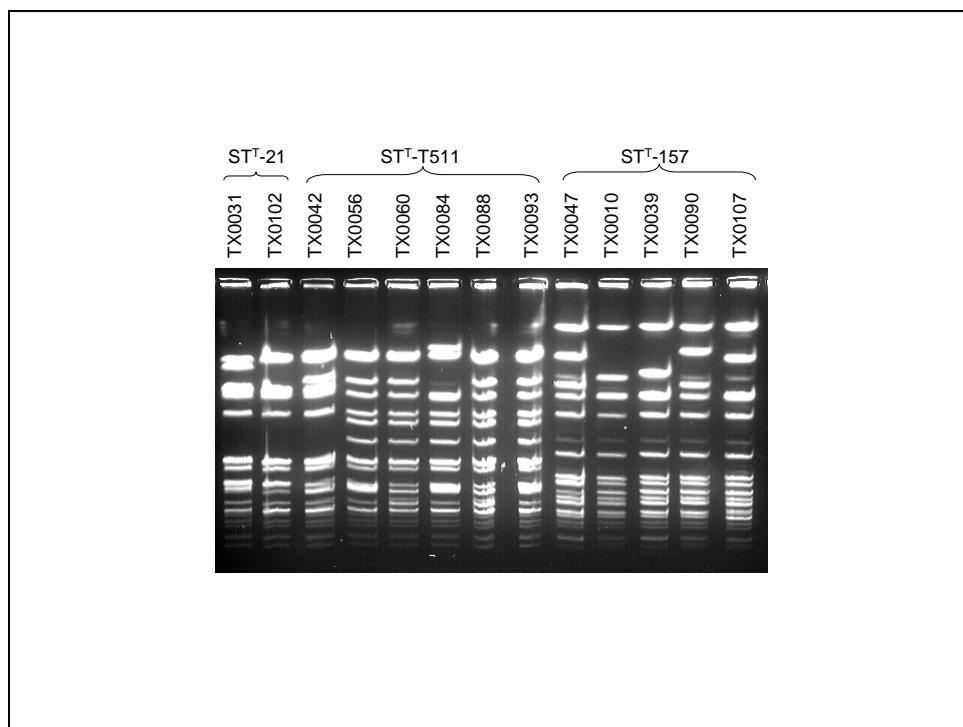

18  
19

20 **Supplementary Tables:**21 Table S1: Infective endocarditis *E. faecalis* isolates from the United States collected between 1974-2004

| Strain <sup>a</sup> | Isolation Location | Year  | ST <sup>†</sup> ( <i>ace, salA, lsa</i> ) | ST <sup>Mb</sup> | CPS type <sup>c</sup> | Reference |
|---------------------|--------------------|-------|-------------------------------------------|------------------|-----------------------|-----------|
| TX0104              | CT                 | 2002  | 2 (8, 2, 9)                               | (2)              | 5                     | (1)       |
| TX0011              | Houston, TX        | 1991  | 6 (3, 8, 13)                              | 6                | 2                     |           |
| TX0053              | Houston, TX        | 1991  | 6 (3, 8, 13)                              | (6)              | 2                     |           |
| TX0052              | Springfield, MO    | 1993  | 6 (3, 8, 13)                              | (6)              | 2                     | (2,3,4,5) |
| TX0026              | WI                 | 1975  | 20 (17, 20, 3)                            | (19)             | 1                     | (6)       |
| TX0023              | Rochester, MN      | 1976  | 20 (17, 20, 3)                            | (19)             | 1                     |           |
| TX0043              | ND                 | 1983  | 20 (17, 20, 3)                            | 19               | 1                     | (1)       |
| TX0029              | Rochester, MN      | 1992  | 20 (17, 20, 3)                            | (19)             | 1                     |           |
| TX0031              | Rochester, MN      | 1992  | 21 (17, 1, 25)                            | 21               | 1                     | (1)       |
| TX0102              | Rochester, MN      | >1990 | 21 (17, 1, 25)                            | 21               | 1                     | (1)       |
| TX0083              | Rochester, MN      | >1990 | 30 (17, 1, 21)                            | -                | 5                     |           |
| TX0109              | Houston, TX        | 2002  | 33 (6, 25, 23)                            | 59               | 1                     | (1)       |
| TX0037              | IL                 | 1974  | 40 (19, 25, 19)                           | 40               | 1                     |           |
| TX0022              | Rochester, MN      | 1992  | 40 (19, 25, 19)                           | 40               | 1                     |           |
| TX0087              | Rochester, MN      | >1990 | 40 (19, 25, 19)                           | (40)             | 1                     |           |
| TX0091              | Rochester, MN      | >1990 | 40 (19, 25, 19)                           | (40)             | 1                     |           |
| TX0095              | Rochester, MN      | >1990 | 40 (19, 25, 19)                           | (40)             | 1                     |           |
| TX0099              | Rochester, MN      | >1990 | 40 (19, 25, 19)                           | (40)             | 1                     |           |
| TX0007              | Houston, TX        | 1992  | 44 (28, 14, 18)                           | (44)             | 1                     |           |
| TX0008              | Reno, NV           | 1992  | 44 (28, 14, 18)                           | (44)             | 1                     |           |
| TX0009              | Reno, NV           | 1992  | 44 (28, 14, 18)                           | (44)             | 1                     |           |
| TX0101              | Rochester, MN      | 2001  | 44 (28, 14, 18)                           | 44               | 1                     |           |
| TX0027              | IA                 | 1975  | 55 (19, 25, 21)                           | 55               | 1                     | (1)       |
| TX0030              | IA                 | 1983  | 55 (19, 25, 21)                           | (55)             | 1                     |           |
| TX0002              | New Haven, CT      | 1993  | 55 (19, 25, 21)                           | 55               | 1                     |           |
| TX0048              | Boston, MA         | <1980 | 55 (19, 25, 21)                           | (55)             | 1                     |           |
| TX0049              | Boston, MA         | <1980 | 55 (19, 25, 21)                           | (55)             | 1                     |           |
| TX0044              | Rochester, MN      | 1975  | 62 (6, 1, 30)                             | 62               | 1                     |           |
| TX0103              | Rochester, MN      | >1990 | 62 (6, 1, 30)                             | (62)             | 1                     |           |
| TX0125              | Houston, TX        | 2004  | 107 (6, 18, 5)                            | 107              | 1                     |           |
| TX0086              | Rochester, MN      | >1990 | 107 (6, 18, 5)                            | (107)            | 1                     |           |
| TX0017              | Houston, TX        | 1992  | 144 (19, 31, 29)                          | 144              | 1                     | (1)       |
| TX0010              | Columbia, OH       | 1992  | 157 (17, 34, 25)                          | 157              | 1                     |           |
| TX0039              | IL                 | 1975  | 157 (17, 34, 25)                          | (157 or 21)      | 1                     |           |
| TX0047              | Boston, MA         | <1980 | 157 (17, 34, 25)                          | (157 or 21)      | 1                     | (6)       |
| TX0090              | Rochester, MN      | >1990 | 157 (17, 34, 25)                          | (157 or 21)      | 1                     |           |
| TX0107              | Houston, TX        | 2002  | 157 (17, 34, 25)                          | 21               | 1                     |           |
| TX0001              | New Haven, CT      | 1993  | 283 (17, 10, 30)                          | 283              | 1                     | (6)       |
| TX0073              | Houston, TX        | 1995  | 283 (17, 10, 30)                          | (283)            | 1                     |           |

|        |               |       |                   |       |   |         |
|--------|---------------|-------|-------------------|-------|---|---------|
| TX0041 | Rochester, MN | 1985  | 287 (30, 1 40)    | (287) | 2 |         |
| TX0055 | Rochester, MN | 1994  | 287 (30, 1, 40)   | (287) | 2 |         |
| TX0092 | Rochester, MN | >1990 | 287 (30, 1, 40)   | 287   | 2 |         |
| TX0034 | Rochester, MN | 1978  | 317 (12, 33, 34)  | (317) | 5 | (6)     |
| TX0045 | Boston, MA    | <1980 | 317 (12, 33, 34)  | 317   | 5 | (2,3,7) |
| TX0046 | Boston, MA    | <1980 | 317 (12, 33, 34)  | (317) | 5 | (2,3,7) |
| TX0066 | Houston, TX   | 1994  | T501 (3, 1, 21)   | -     | 5 |         |
| TX0079 | Houston, TX   | 1996  | T502 (4, 7, 35)   | -     | 1 |         |
| TX0085 | Rochester, MN | >1990 | T503 (4, 32, 20)  | -     | 2 |         |
| TX0004 | New Haven, CT | 1993  | T504 (6, 18, 42)  | -     | 5 |         |
| TX0014 | Houston, TX   | 1992  | T505 (6, 34, 21)  | -     | 1 |         |
| TX0025 | Rochester, MN | 1984  | T506 (6, 34, 42)  | -     | 2 | (6)     |
| TX0036 | Rochester, MN | 1977  | T507 (6, 35, 5)   | -     | 2 |         |
| TX0065 | Rochester, MN | 1994  | T508 (6, 36, 44)  | -     | 5 |         |
| TX0006 | New Haven, CT | 1993  | T509 (10, 11, 21) | -     | 1 |         |
| TX0003 | New Haven, CT | 1993  | T510 (13, 2, 12)  | -     | 1 |         |
| TX0042 | Rochester, MN | 1992  | T511 (17, 1, 36)  | 21    | 1 |         |
| TX0056 | Rochester, MN | 1994  | T511 (17, 1, 36)  | (21)  | 1 |         |
| TX0060 | Rochester, MN | 1994  | T511 (17, 1, 36)  | 21    | 1 |         |
| TX0084 | Rochester, MN | >1990 | T511 (17, 1, 36)  | 21    | 1 |         |
| TX0088 | Rochester, MN | >1990 | T511 (17, 1, 36)  | 21    | 1 |         |
| TX0093 | Rochester, MN | >1990 | T511 (17, 1, 36)  | (21)  | 1 |         |
| TX0032 | Rochester, MN | 1976  | T512 (17, 20, 45) | -     | 5 |         |
| TX0012 | Houston, TX   | 1991  | T513 (33, 40, 37) | -     | 1 | (1)     |
| TX0063 | Rochester, MN | 1994  | T514 (19, 31, 39) | -     | 1 |         |
| TX0105 | TN            | 2002  | T515 (29, 3, 15)  | -     | 5 |         |
| TX0013 | Houston, TX   | 1992  | T516 (31, 37, 41) | -     | 1 |         |
| TX0098 | Rochester, MN | >1990 | T517 (34, 42, 32) | -     | 2 |         |
| TX0040 | IL            | 1974  | T518 (35, 28, 28) | -     | 1 |         |
| TX0106 | TN            | 2002  | T519 (36, 2, 9)   | -     | 5 |         |
| TX0020 | Houston, TX   | 1991  | T520 (37, 25, 40) | -     | 5 |         |
| TX0035 | Rochester, MN | 1992  | T521 (38, 20, 38) | -     | 1 |         |
| TX0028 | Rochester, MN | 1992  | T522 (39, 38, 47) | -     | 1 |         |
| TX0057 | Rochester, MN | 1994  | T523 (40, 36, 43) | NT    | 5 |         |
| TX0061 | Rochester, MN | 1994  | T523 (40, 36, 43) | (NT)  | 5 |         |
| TX0089 | Rochester, MN | >1990 | T523 (40, 36, 43) | NT    | 5 |         |
| TX0097 | Rochester, MN | >1990 | T524 (41, 30, 46) | -     | 5 |         |
| TX0108 | Houston, TX   | 2002  | T525 (34, 1, 32)  | 4     | 2 |         |
| TX0128 | Houston, TX   | 2004  | T525 (34, 1, 32)  | (4)   | 2 |         |
| TX0018 | Houston, TX   | 1991  | T526 (3, 39, 7)   |       | 1 |         |
| TX0094 | Rochester, MN | >1990 | T527 (32, 41, 4)  |       | 5 |         |
| TX0019 | Houston, TX   | 1992  | T528 (32, 27, 4)  | 34    | 5 |         |

23           <sup>a</sup> Isolates are ordered by ST<sup>T</sup> based on intragenic sequences of *ace*, *sala*, and *lsa*. ST<sup>T</sup>s not  
24 described previously in isolates typed (5) which had MLST data were assigned, when possible, the same  
25 type number as the corresponding ST<sup>M</sup>; isolates which did not have MLST data, the ST<sup>M</sup> was not in the  
26 database, or the ST<sup>M</sup> corresponded with another published ST<sup>T</sup> allelic profile were assigned an arbitrary  
27 number beginning with T500.

28           <sup>b</sup> ST<sup>M</sup>s are per the seven-housekeeping-gene scheme and assigned in accordance with the database  
29 at <http://efaecalis.mlst.net/>. Types contained within ( ) were inferred based on identical ST<sup>T</sup>s.

30 NT – a new ST<sup>M</sup> not assigned yet in the MLST database (allele types as follows: *gdh-9*, *gyd-5*, *pstS-4*, *gki-*  
31 *16*, *aroE-1*, *xpt-11*, *yqil-8*).

32           <sup>c</sup> The *cps* gene locus types were designated as follows: type 1 (corresponding to serotype A & B)  
33 possesses *cpsA* and *cpsB* only; type 2 (corresponding to serotype C) possesses *cpsA-cpsK*; type 5  
34 (corresponding to serotype D) possesses *cpsA-cpsK* except *cpsF* (8, 9,10).

35









42 **Supplementary Figure Legends:**

43 Fig. S1a - PFGE of isolates within ST<sup>T</sup>-40 (n=6) and ST<sup>T</sup>-55 (n=5) clonal lineages.

44 Black brackets group isolates with an identical ST<sup>T</sup>. Strains are listed vertically above

45 their corresponding lanes. *E. faecium* TX0016 (DO) was used as a standard.

46

47 Fig. S1b - PFGE of isolates within CC21 (n = 13). CC21 contains isolates within ST<sup>T</sup>-21

48 (n=2), ST<sup>T</sup>-T511 (n=6), and ST<sup>T</sup>-157 (n=5) clonal lineages. Black brackets group

49 isolates with an identical ST<sup>T</sup>. Strains are listed vertically above their corresponding

50 lanes.

51

52 **References:**

- 53 **1. Nallapareddy SR, Sillanpaa J, Mitchell J, Singh KV, Chowdhury SA, Weinstock**  
54 **GM, Sullam PM, Murray BE.** 2011. Conservation of Ebp-type pilus genes  
55 among enterococci and demonstration of their role in adherence of *Enterococcus*  
56 *faecalis* to human platelets. *Infect. Immun.* **79**:2911-2920.
- 57 **2. Chowdhury SA, Arias CA, Nallapareddy SR, Reyes J, Willems RJ, Murray BE.**  
58 2009. A tri-locus sequence typing scheme for hospital epidemiology and  
59 subspecies differentiation of an important nosocomial pathogen, *Enterococcus*  
60 *faecalis*. *J. Clin. Microbiol.* **47**(9):2713-9.
- 61 **3. Malathum K, Singh KV, Weinstock GM, Murray BE.** 1998. Repetitive sequence-  
62 based PCR versus pulsed-field gel electrophoresis for typing of *Enterococcus*  
63 *faecalis* at the subspecies level. *J. Clin. Microbiol.* **36**:211-215.
- 64 **4. Nallapareddy SR, Wenxiang H, Weinstock GM, Murray BE.** 2005. Molecular  
65 characterization of a widespread, pathogenic, and antibiotic resistance-receptive  
66 *Enterococcus faecalis* lineage and dissemination of its putative pathogenicity  
67 island. *J. Bacteriol.* **187**:5709-18.
- 68 **5. Ruiz-Garbajosa P, Bonten MJ, Robinson DA, Top J, Nallapareddy SR, Torres C,**  
69 **Coque TM, Canton R, Baquero F, Murray BE, del Campo R, Willems RJ.**  
70 2006. Multilocus sequence typing scheme for *Enterococcus faecalis* reveals  
71 hospital-adapted genetic complexes in a background of high rates of  
72 recombination. *J. Clin. Microbiol.* **44**:2220-8.
- 73 **6. Mohamed JA, Huang W, Nallapareddy SR, Teng F, Murray BE.** 2004. Influence  
74 of origin of isolates, especially endocarditis isolates, and various genes on biofilm  
75 formation by *Enterococcus faecalis*. *Infect. Immun.* **72**:3658-3663.

- 76 **7. Tomayko JF, Murray BE.** 1995. Analysis of *Enterococcus faecalis* isolates from  
77 intercontinental sources by multilocus enzyme electrophoresis and pulsed-field  
78 gel electrophoresis. J. Clin. Microbiol. **42**:4879-4881.
- 79 **8. Hancock LE, Gilmore MS.** 2002. The capsular polysaccharide of *Enterococcus*  
80 *faecalis* and its relationship to other polysaccharides in the cell wall. Proc. Natl.  
81 Acad. Sci. U.S.A. **99(3)**:1574-1579.
- 82 **9. Hufnagel M, Hancock LE, Koch S, Theilacker C, Gilmore MS, Huebner J.** 2004.  
83 Serological and genetic diversity of capsular polysaccharides in *Enterococcus*  
84 *faecalis*. Microbiol. **42**:2548-2557.
- 85 **10. McBride SM, Fischetti VA, Leblanc DJ, Moellering RC Jr, Gilmore MS.** 2007.  
86 Genetic diversity among *Enterococcus faecalis*. PLoS One **2(7)**:e582.
